# Supplementary material for: Comparison between Suspected and Confirmed COVID-19 Respiratory Patients: What Is beyond the PCR Test
Source: MDPI journal article supplement (doi:10.3390/jcm11112993), 2022-05-25
Supplement: s1 [file s1]

# Comparison between Suspected and Confirmed COVID-19 Respiratory Patients: What Is beyond the PCR Test

Stefania Principe <sup>1,2</sup>, Amelia Grosso <sup>3</sup>, Alida Benfante <sup>1</sup>, Federica Albicini <sup>3</sup>, Salvatore Battaglia <sup>1</sup>, Erica Gini <sup>3</sup>, Marta Amata <sup>1</sup>, Ilaria Piccionello <sup>1</sup>, Angelo Guido Corsico <sup>3</sup> and Nicola Scichilone <sup>1,\*</sup>

<sup>1</sup> Department of Pulmonology–Palermo (PA) (Italy), AOUP Policlinico Paolo Giaccone, University of Palermo, 90127 Palermo, Italy

<sup>2</sup> Department of Respiratory Medicine–Amsterdam, Amsterdam UMC, University of Amsterdam, 1105 AZ Amsterdam, The Netherlands

<sup>3</sup> Department of Pulmonology, Fondazione IRCCS Policlinico San Matteo, 27100 Pavia, Italy

## Supplementary Material

**Table S1.** Logistic regression model with symptoms and physiological features. OR: Odd ratio; CI(95%): Confidence interval at 95%.

|                            | OR    | CI (95%)     | P-value |
|----------------------------|-------|--------------|---------|
| <b>Smoking History</b>     |       |              |         |
| Never                      | 0.87  | (0.5, 7.8)   | 0.402   |
| Ex                         | 0.95  | (0.05,17.48) | 0.974   |
| Active                     | 4.14  | (0.45,38.47) | 0.211   |
| <b>Fever</b>               | 12.4  | (0.12,17.5)  | 0.993   |
| <b>Dyspnea</b>             | 12.59 | (1.7,93)     | 0.013   |
| <b>Respiratory Failure</b> | 8.42  | (1.32,53.62) | 0.024   |

**Table S2.** Logistic regression model with radiological findings. OR: Odd ratio; CI(95%): Confidence interval at 95%. CT: Chest-Tomography

|                         | OR   | CI (95%)    | P-value |
|-------------------------|------|-------------|---------|
| <b>CT- Positive</b>     | 3.73 | (1.68,8.28) | 0.001   |
| <b>Pleural effusion</b> | 0.24 | (0.09,0.63) | 0.002   |

**Table S3.** Logistic regression model with laboratory findings. OR: Odd ratio; CI(95%): Confidence interval at 95%. CPR: C-Reactive Protein; LDH: Lactic dehydrogenase.

|                    | OR   | CI (95%)    | P-value |
|--------------------|------|-------------|---------|
| <b>Lymphocytes</b> | 0.99 | (0.94,1.05) | 0.886   |
| <b>CPR</b>         | 1.02 | (0.11,1.02) | < 0.001 |
| <b>LDH</b>         | 1.01 | (0.99,1.03) | 0.423   |
